# Supplementary material
Source: HighWire-hosted journal article supplement (https://jnm.snmjournals.org/highwire/filestream/94175/field_highwire_adjunct_files/0/81059_Supplemental_Data.pdf)
Supplement: 81059_Supplemental_Data.pdf [file 81059_Supplemental_Data.pdf]

## **SUPPLEMENTAL DATA:**

### **Statistics.**

The significance of group differences (between survivors and deceased patients, and between early-treatment and delayed-treatment groups) was assessed with the Chi-square test or Wilcoxon/Kruskal-Wallis test. Patients were stratified and analyzed by univariate analysis using the log-rank test. The crude and age-adjusted hazard ratios (HR) and 95% confidence intervals (95% CI) were calculated using the Cox proportional hazards regression model. The significance of group differences for survival was assessed with the log-rank test in the Kaplan-Meier life-tables. The 'person-years' of follow-up were calculated from the date of initial RIT to the primary endpoint, or the date of censoring. Cumulative disease-specific survival (DSS) rates were obtained using the Kaplan-Meier method. According to the univariate analysis, significant factors were selected for the multivariate analysis using the stratified Cox proportional hazards model in total patients and also in the patients with age 45 y.o. or more at the time of initial RIT.

## **RESULTS**

### **Univariate Analysis of Each Prognostic Factor.**

Supplemental Table 1 showed the prognostic factors evaluated by Cox regression analysis, in which univariate analysis using two or three way segmentation was performed. Age-adjusted hazard ratio was also examined (Supplemental Table 1 right column).

To confirm the results of Supplemental Table 1, these prognostic factors were also evaluated by Cox regression analysis using quartile segmentation (Supplemental Table 2). The factor, interval between total thyroidectomy and the initial RIT also had significant prognostic values both in total examination and in age-adjusted examination. There was no significant difference in prognostic value between two subgroups, interval (-75 days) and interval (-157 days).

### **Comparison between Early-Treatment Group and Delayed-Treatment Group**

Supplemental Table 3 showed comparative results between early-treatment group (RIT was performed within 180 days after total thyroidectomy) and delayed-treatment group (180 days or more after total

thyroidectomy). There was no significant difference between these two groups in the following factors, average number of RIT, gender, prescribed dose of radioiodine at initial RIT, pathology, extent of metastasis, past history of thyroid surgery, and Tg levels. The other factors, number of RIT (separated in 4-grade-scale), follow-up periods, age at initial RIT, showed significant differences. Delayed-treatment group consisted of relatively higher percentage of papillary adenocarcinoma cases, as compared to early-treatment group (n.s.). Grade of WBS was worse in delayed-treatment group than in early-treatment group ( $n=0.010$ ). Other therapeutic procedures in the interval between initial thyroidectomy (hemi, subtotal or total) and initial RIT were performed more frequently in the delayed-treatment group ( $n=0.002$ ). The longest blank period of therapy (observation period without therapy) in the interval between initial thyroidectomy (hemi, subtotal or total) and initial RIT was significantly shorter in the early-treatment group ( $n=0.001$ ).

To confirm the prognostic role of early-treatment, the following four subgroups of patients were also analyzed using Kaplan-Meier analysis; 1) patients with age 45 y.o. or more ( $n=150$ ), 2) patients with preTg at initial RIT more than 125 ng/ml ( $n=57$ ), 3) patients with lung metastases with/without LN metastases, but without bone metastases or others ( $n=105$ ), and 4) patients with bone metastases or more ( $n=46$ ) (Supplemental Fig 1). The log-rank test in the Kaplan-Meier life-tables showed that the factor, interval between total thyroidectomy and initial RIT (180days or more), showed significant prognostic values in all the subgroups, except for the subgroup with preTg > 125.

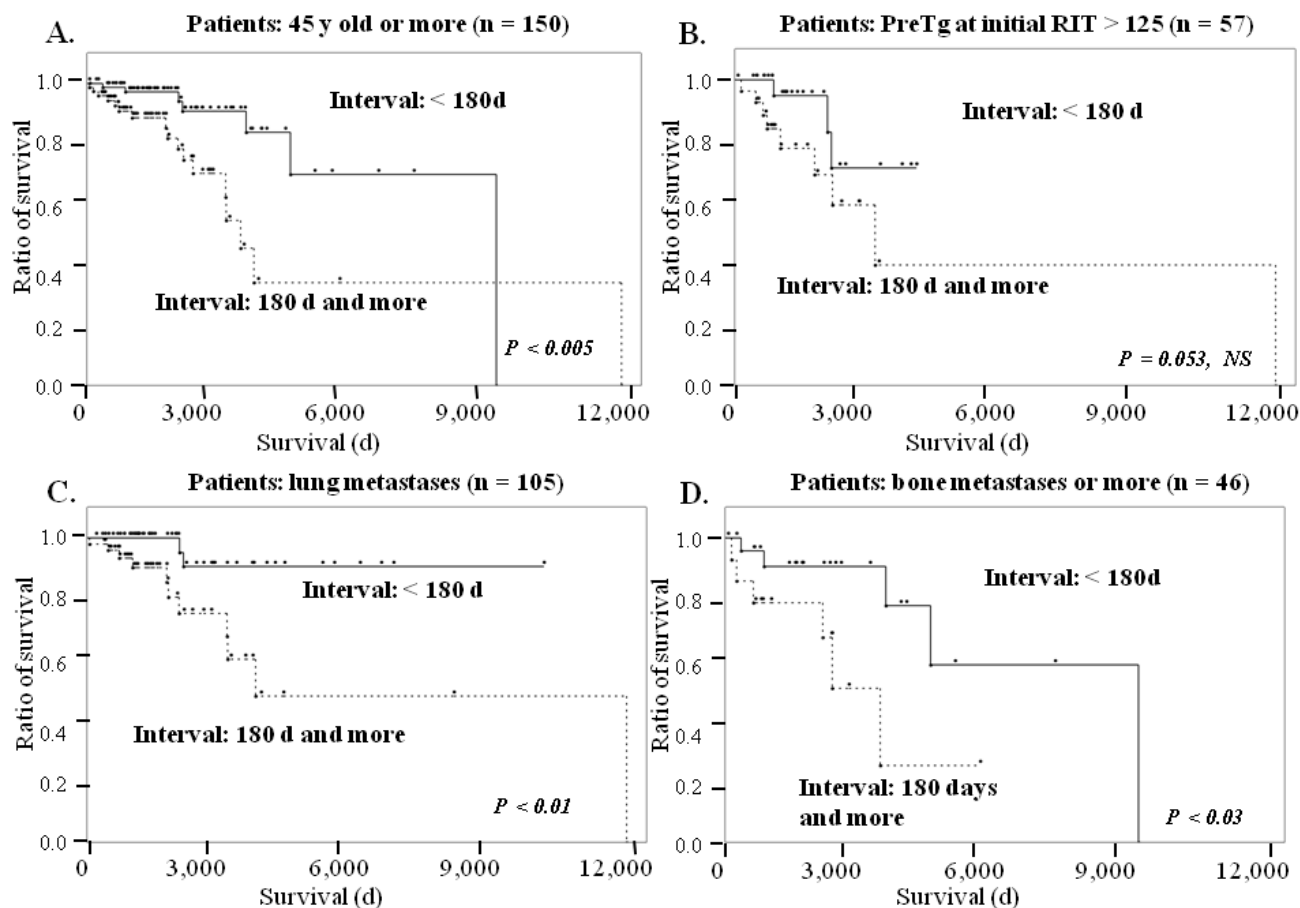

Supplemental Fig. 1. Survival curves of various subgroups of DTC patients analyzed by Kaplan-Meier life-tables separated by the interval=180days.

A. Patients who are 45 y.o. or more.

B. Patients with pre-treatment thyroglobulin (preTg) > 125 ng/ml.

C. Patients with lung metastasis (including LN metastasis) without bone or other metastasis (extent of metastasis: 2).

D. Patients with bone metastasis (including LN and lung metastasis) without other metastasis (extent of metastasis: 3).

**Supplemental Table 1. Cox regression Analysis of Prognostic Factors at the time of Initial RIT**  
**Univariate Analysis using Two or Three Way Segmentation**

|                                                             | Primary Endpoint: Disease-specific Death |       |                  |                   |                          |              |
|-------------------------------------------------------------|------------------------------------------|-------|------------------|-------------------|--------------------------|--------------|
|                                                             | Person-years                             | Cases | HR (95% CI)      | P value           | Age adjusted HR (95% CI) | P value      |
| <b>All treatment (n=198)</b>                                | 1073.4                                   | 24    |                  |                   |                          |              |
| <b>Age at initial RIT</b>                                   |                                          |       |                  |                   |                          |              |
| < 45 y.o. (n=48)                                            | 302.8                                    | 0     | 1.00             |                   | -                        |              |
| 45 y.o. or more (n=150)                                     | 770.6                                    | 24    | -                | <b>0.002</b>      | -                        | -            |
| <b>Gender</b>                                               |                                          |       |                  |                   |                          |              |
| Male (n=77)                                                 | 367.0                                    | 11    | 1.00             |                   | 1.00                     |              |
| Female (n=121)                                              | 706.5                                    | 13    | 0.66 (0.29-1.51) | 0.324             | 0.68 (0.29-1.57)         | 0.360        |
| <b>Prescribed dose of I-131 at initial RIT</b>              |                                          |       |                  |                   |                          |              |
| < 100mCi (n=82)                                             | 474.4                                    | 7     | 1.00             |                   | 1.00                     |              |
| 100mCi or more (n=116)                                      | 599.0                                    | 14    | 1.99 (0.82-4.85) | 0.121             | 1.23 (0.50-3.02)         | 0.650        |
| <b>Number of RITs</b>                                       |                                          |       |                  |                   |                          |              |
| Single treatment (n=71)                                     | 240.1                                    | 6     | 1.00             |                   | 1.00                     |              |
| Multiple treatment (n=127)                                  | 833.3                                    | 18    | 0.98 (0.36-2.69) | 0.963             | 0.74 (0.27-2.05)         | 0.560        |
| <b>Pathology</b>                                            |                                          |       |                  |                   |                          |              |
| PAC (n=164)                                                 | 868.8                                    | 20    | 1.00             |                   | 1.00                     |              |
| FAC and others (n=34)                                       | 204.6                                    | 4     | 0.78 (0.26-2.28) | 0.645             | 0.77 (0.26-2.28)         | 0.630        |
| <b>Grade of uptake in WBS at initial RIT</b>                |                                          |       |                  |                   |                          |              |
| Excellent: 0 or Good: 1 (n=145)                             | 853.8                                    | 14    | 1.00             |                   | 1.00                     |              |
| Fair: 2 or Poor: 3 (n=53)                                   | 219.6                                    | 10    | 2.05 (1.14-3.70) | <b>0.015</b>      | 1.36 (0.74-2.48)         | 0.330        |
| <b>Extent of metastasis at initial RIT</b>                  |                                          |       |                  |                   |                          |              |
| Local disease or LN mets only:1 (n=47)                      | 226.7                                    | 0     | 1.00             |                   | 1.00                     |              |
| Lung mets with or without LN mets: 2 (n=105)                | 578.4                                    | 13    | -                | <b>0.003</b>      | -                        | <b>0.003</b> |
| Bone mets or more: 3 or 4 (n=46)                            | 268.2                                    | 11    | -                | <b>0.003</b>      | -                        | <b>0.003</b> |
| up to lung metastasis (n=152)                               | 805.2                                    | 13    | 1.00             |                   | 1.00                     |              |
| bone metastasis or more (n=46)                              | 268.2                                    | 11    | 2.78 (1.25-6.22) | <b>0.009</b>      | 2.03 (0.91-4.53)         | 0.086        |
| <b>Interval between total thyroidectomy and initial RIT</b> |                                          |       |                  |                   |                          |              |
| < 180 days (n=106)                                          | 649.9                                    | 7     | 1.00             |                   | 1.00                     |              |
| 180 days or more (n=92)                                     | 423.5                                    | 17    | 4.07 (1.67-9.89) | <b>&lt; 0.001</b> | 3.18 (1.29-7.82)         | <b>0.012</b> |
| <b>PreTg at initial RIT</b>                                 |                                          |       |                  |                   |                          |              |
| < 125 ng/ml (n=51)                                          | 231.3                                    | 0     | 1.00             |                   | 1.00                     |              |
| 125 ng/ml or more (n=57)                                    | 243.8                                    | 12    | -                | <b>&lt; 0.001</b> | -                        | <b>0.003</b> |
| <b>PeakTg at initial RIT</b>                                |                                          |       |                  |                   |                          |              |
| < 1000 ng/ml (n=91)                                         | 415.9                                    | 2     | 1.00             |                   | 1.00                     |              |
| 1000 ng/ml or more (n=73)                                   | 347.1                                    | 14    | 8.35 (1.90-36.8) | <b>&lt; 0.001</b> | 6.20 (1.39-27.6)         | <b>0.017</b> |
| <b>PostTg at initial RIT</b>                                |                                          |       |                  |                   |                          |              |
| < 50 ng/ml (n=70)                                           | 305.9                                    | 2     | 1.00             |                   | 1.00                     |              |
| 50 ng/ml or more (n=73)                                     | 303.3                                    | 12    | 6.11 (1.37-27.3) | <b>0.007</b>      | 4.86 (1.09-21.7)         | <b>0.039</b> |

HR (95% CI) = Hazard ratio (95% Confidence interval)

RIT: radioactive iodine therapy

PAC: papillary adenocarcinoma, FAC: follicular adenocarcinoma

WBS: I-131 whole body scintigraphy, LN: lymph node, mets: metastases

PreTg: thyroglobulin before RIT; PeakTg: thyroglobulin at the time of RIT; PostTg: thyroglobulin after RIT

**Supplemental Table 2. Cox Regression Analysis of Prognostic Factors at the Time of Initial RIT**  
**Univariate Analysis Using Quartile Segmentation**

| Variables                                                   | Person-years | Cases | HR (95% CI)      | P value | Age adjusted HR (95% CI) | P value |
|-------------------------------------------------------------|--------------|-------|------------------|---------|--------------------------|---------|
| <b>All treatment (n=198)</b>                                | 1073.4       | 24    |                  |         |                          |         |
| <b>Age at initial RIT</b>                                   |              |       |                  |         |                          |         |
| 1st quartile (7 - 45 y.o.)                                  | 334.8        | 0     | -                | < 0.001 | -                        | -       |
| 2nd quartile (46 - 57 y.o.)                                 | 248.4        | 5     | 1.00             |         | -                        | -       |
| 3rd quartile (58 - 65 y.o.)                                 | 254.6        | 12    | 2.13 (0.16-1.34) | 0.151   | -                        | -       |
| 4th quartile (66 - 84 y.o.)                                 | 235.5        | 7     | 1.71 (0.17-2.03) | 0.393   | -                        | -       |
| <b>Prescribed dose of I-131 at initial RIT</b>              |              |       |                  |         |                          |         |
| 1st quartile (18 - 80 mCi)                                  | 189.4        | 2     | 1.00             |         | 1.00                     |         |
| 2nd quartile (81 - 116 mCi)                                 | 391.8        | 7     | 1.20 (0.23-6.27) | 0.831   | 1.38 (0.23-8.36)         | 0.727   |
| 3rd quartile (117 - 125 mCi)                                | 254.9        | 9     | 2.50 (0.53-11.8) | 0.231   | 2.01 (0.42-9.61)         | 0.38    |
| 4th quartile (126 - 162 mCi)                                | 237.3        | 6     | 2.98 (0.61-14.5) | 0.158   | 2.62 (0.51-13.45)        | 0.249   |
| <b>Interval between total thyroidectomy and initial RIT</b> |              |       |                  |         |                          |         |
| 1st quartile (25 - 75 days)                                 | 322.5        | 2     | 1.00             |         | 1.00                     |         |
| 2nd quartile (76 - 157 days)                                | 286.8        | 6     | 2.37 (0.43-13.0) | 0.305   | 7.79 (0.92-65.85)        | 0.059   |
| 3rd quartile (158 - 1059 days)                              | 200.7        | 6     | 5.05 (1.04-24.5) | 0.026   | 5.99 (1.20-30.03)        | 0.029   |
| 4th quartile (1060 - 11300 days)                            | 263.4        | 10    | 6.81 (1.48-31.3) | 0.004   | 5.56 (1.20-25.74)        | 0.028   |
| <b>PreTg at initial RIT</b>                                 |              |       |                  |         |                          |         |
| 1st quartile (3 - 30 ng/ml)                                 | 106.7        | 0     | -                | 0.001   | -                        | 0.001   |
| 2nd quartile (31 - 123 ng/ml)                               | 139.2        | 0     | -                | 0.001   | -                        | 0.001   |
| 3rd quartile (124 - 825 ng/ml)                              | 90.5         | 4     | 1.00             |         | 1.00                     |         |
| 4th quartile (826 - 46400 ng/ml)                            | 138.9        | 8     | 1.07 (0.33-3.44) | 0.110   | 1.17 (0.37-3.74)         | 0.260   |
| <b>PeakTg at initial RIT</b>                                |              |       |                  |         |                          |         |
| 1st quartile (0.1 - 185 ng/ml)                              | 167.4        | 0     | -                | 0.002   | -                        | 0.002   |
| 2nd quartile (186 - 715 ng/ml)                              | 190.0        | 1     | 0.21 (0.02-1.73) | 0.150   | 0.28 (0.03-2.52)         | 0.260   |
| 3rd quartile (716 - 4369 ng/ml)                             | 198.4        | 6     | 1.00             |         | 1.00                     |         |
| 4th quartile (4370 - 232000 ng/ml)                          | 207.2        | 9     | 1.64 (0.22-1.72) | 0.35    | 1.74 (0.20-1.64)         | 0.30    |
| <b>PostTg at initial RIT</b>                                |              |       |                  |         |                          |         |
| 1st quartile (0.1 - 9 ng/ml)                                | 159.2        | 0     | -                | 0.001   | -                        | 0.001   |
| 2nd quartile (10 - 54 ng/ml)                                | 116.2        | 2     | 0.62 (0.12-3.24) | 0.569   | 0.63 (0.12-3.29)         | 0.580   |
| 3rd quartile (55 - 555 ng/ml)                               | 151.3        | 5     | 1.00             |         | 1.00                     |         |
| 4th quartile (556 - 34500 ng/ml)                            | 182.4        | 7     | 1.22 (0.26-2.61) | 0.736   | 1.17 (0.36-3.82)         | 0.789   |

HR (95% CI) = Hazard ratio (95% Confidence interval)

RIT: radioactive iodine therapy

PreTg: thyroglobulin before RIT; PeakTg: thyroglobulin at the time of RIT; PostTg: thyroglobulin after RIT (detailed definition: see Materials and Methods)

Supplemental Table 3. Comparison Between Early-Treatment Group and Delayed-Treatment Group

|                                                                                                                                            | Early-treatment<br>group (within 180<br>days) | Delayed-treatment<br>group (180days or<br>more) | P value      |
|--------------------------------------------------------------------------------------------------------------------------------------------|-----------------------------------------------|-------------------------------------------------|--------------|
| <b>Patient number</b>                                                                                                                      | n= 109                                        | n= 89                                           |              |
| <b>Number of RIT</b>                                                                                                                       |                                               |                                                 |              |
| n=1                                                                                                                                        | 38 (35%)                                      | 33 (37%)                                        |              |
| n=2-5                                                                                                                                      | 49 (45%)                                      | 50 (56%)                                        |              |
| n=6-9                                                                                                                                      | 17 (16%)                                      | 5 (6%)                                          |              |
| n=10 or more                                                                                                                               | 5 (5%)                                        | 1 (1%)                                          | <b>0.043</b> |
| Average number of RIT ( Min - Max )                                                                                                        | 3.4 (1 - 26)                                  | 2.4 (1 - 10)                                    | 0.154        |
| <b>Follow-up periods</b>                                                                                                                   |                                               |                                                 |              |
| Mean time ( Min - Max) (year)                                                                                                              | 5.98 (1.13 - 26.84)                           | 4.62 (0.14 - 31.74)                             | <b>0.009</b> |
| <b>Age at initial RIT</b>                                                                                                                  |                                               |                                                 |              |
| Mean age (Min - Max) (y.o.)                                                                                                                | 50.4 (7 - 84)                                 | 58.4 (10 - 83)                                  | <b>0.001</b> |
| < 45 y.o. : 45 y.o. or more (number)                                                                                                       | 31 : 78                                       | 15 : 74                                         | 0.072        |
|                                                                                                                                            | (28% : 72%)                                   | (17% : 83%)                                     |              |
| <b>Gender</b>                                                                                                                              |                                               |                                                 |              |
| Male : Female (number)                                                                                                                     | 42 : 67                                       | 35 : 54                                         | 0.909        |
|                                                                                                                                            | (38% : 62%)                                   | (39% : 61%)                                     |              |
| <b>Prescribed dose of I-131 at initial RIT</b>                                                                                             |                                               |                                                 |              |
| Mean dose (Min - Max) ( MBq )                                                                                                              | 3,781.4 (1,665 - 5,328)                       | 3,755.5 (296 - 5,994)                           |              |
| ( mCi )                                                                                                                                    | 102.2 (45 - 144)                              | 101.5 (18 - 162)                                | 0.973        |
| <b>Pathology</b>                                                                                                                           |                                               |                                                 |              |
| PAC : FAC : others                                                                                                                         | 85 : 19 : 5                                   | 79 : 9 : 1                                      | 0.093        |
|                                                                                                                                            | (78% : 17% : 5%)                              | (88% : 10% : 1%)                                |              |
| <b>Grade of uptake in WBS at initial RIT</b>                                                                                               |                                               |                                                 |              |
| excellent: 0                                                                                                                               | 74 (68%)                                      | 43 (48%)                                        |              |
| good: 1                                                                                                                                    | 10 (9%)                                       | 18 (20%)                                        |              |
| fair: 2                                                                                                                                    | 25 (23%)                                      | 26 (29%)                                        |              |
| poor: 3                                                                                                                                    | 0 (0%)                                        | 2 (2%)                                          | <b>0.010</b> |
| <b>Extent of metastasis at initial RIT</b>                                                                                                 |                                               |                                                 |              |
| Local disease or LN mets only: 1                                                                                                           | 24 (22%)                                      | 23 (26%)                                        |              |
| Lung mets with or without LN mets: 2                                                                                                       | 56 (51%)                                      | 49 (55%)                                        |              |
| Bone mets or more: 3 or 4                                                                                                                  | 29 (27%)                                      | 17 (19%)                                        | 0.596        |
| <b>Interval between total thyroidectomy and initial</b>                                                                                    |                                               |                                                 |              |
| Mean time ( Min - Max) (year)                                                                                                              | 0.25 (0.07 - 0.48)                            | 5.40 (0.53 - 30.98)                             |              |
| (day)                                                                                                                                      | 90.3 (25 - 177)                               | 1,970.1 (193 - 11,308)                          |              |
| <b>Past thyroid surgery before total thyroidectomy</b>                                                                                     |                                               |                                                 |              |
| Hemi or subtotal thyroidectomy: none                                                                                                       | 65 (60%)                                      | 59 (66%)                                        |              |
| Hemi or subtotal thyroidectomy: performed                                                                                                  | 38 (35%)                                      | 21 (24%)                                        |              |
| Unknown                                                                                                                                    | 6 (6%)                                        | 9 (10%)                                         | 0.147        |
| Average interval between hemi/subtotal and total (year).                                                                                   | 6.6 (n=38)                                    | 5.7 (n=21)                                      | 0.223        |
| <b>Past other therapeutic history in the interval between<br/>initial thyroidectomy (hemi, subtotal or total) and initial RIT</b>          |                                               |                                                 |              |
| None                                                                                                                                       | 89 (82%)                                      | 53 (60%)                                        |              |
| Performed (local resection, LN resection, radiation, etc)                                                                                  | 14 (13%)                                      | 28 (31%)                                        |              |
| Unknown                                                                                                                                    | 6 (6%)                                        | 8 (9%)                                          | <b>0.002</b> |
| <b>The longest blank period of therapy<br/>in the interval between initial thyroidectomy<br/>(hemi, subtotal or total) and initial RIT</b> |                                               |                                                 |              |
| treated within 180 days                                                                                                                    | 67 (61%)                                      | 0 (0%)                                          |              |
| treated with interval of 180-364 days                                                                                                      | 2 (2%)                                        | 18 (20%)                                        |              |
| 1 - 2 years                                                                                                                                | 1 (1%)                                        | 10 (11%)                                        |              |
| 2 - 3 years                                                                                                                                | 7 (6%)                                        | 6 (7%)                                          |              |
| 3 years or more                                                                                                                            | 26 (24%)                                      | 47 (53%)                                        |              |
| unknown                                                                                                                                    | 6 (6%)                                        | 8 (9%)                                          | <b>0.001</b> |
| <b>PreTg at initial RIT</b>                                                                                                                |                                               |                                                 |              |
| Mean (Min - Max) ( ng/ml )                                                                                                                 | 2,141 (3.0 - 464,386)                         | 1,083 (4.3 - 7,557)                             | 0.296        |
| <b>PeakTg at initial RIT</b>                                                                                                               |                                               |                                                 |              |
| Mean (Min - Max) ( ng/ml )                                                                                                                 | 8,203 (0.1 - 232,453)                         | 7,047 (16.6 - 78,921)                           | 0.764        |
| <b>PostTg at initial RIT</b>                                                                                                               |                                               |                                                 |              |
| Mean (Min - Max) ( ng/ml )                                                                                                                 | 1,208 (0.1 - 34,461)                          | 1,143 (0.1 - 19,880)                            | 0.922        |
| <b>RIT: radioactive iodine therapy</b>                                                                                                     |                                               |                                                 |              |
| <b>PAC: papillary adenocarcinoma, FAC: follicular adenocarcinoma</b>                                                                       |                                               |                                                 |              |
| <b>WBS: I-131 whole body scintigraphy, LN: lymph node, mets: metastases</b>                                                                |                                               |                                                 |              |
| <b>PreTg: thyroglobulin before RIT; PeakTg: thyroglobulin at the time of RIT; PostTg: thyroglobulin after RIT</b>                          |                                               |                                                 |              |
